# Supplementary material for: Characterization of Insulin-Like Growth Factor Binding Protein-5 (IGFBP-5) Gene and Its Potential Roles in Ontogenesis in the Pacific Abalone, Haliotis discus hannai
Source: MDPI journal article supplement (doi:10.3390/biology9080216), 2020-08-09
Supplement: s1 [file s1]

**Supplementary figure**

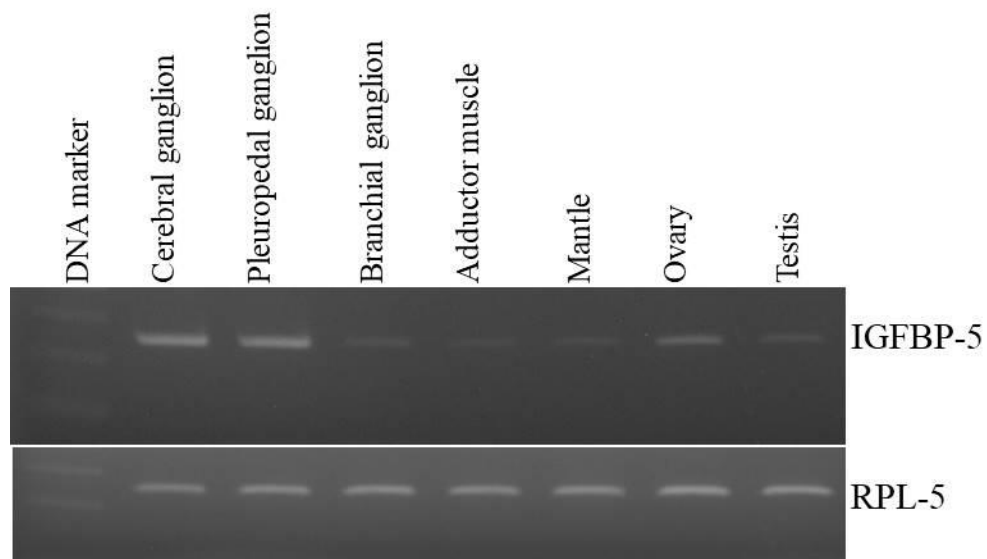

**Figure S1.** Hdh IGFBP-5 mRNA expression in the neural ganglion (cerebral, pleuropedal, and branchial), adductor muscle, mantle, and gonad (testis and ovary) was determined by semi-quantitative RT-PCR. For normalization of mRNA expression in tissues, RPL-5 gene was used as an internal reference.
